# Supplementary material for: All chemically deposited, annealing and mesoporous metal oxide free CdSe solar cells
Source: Royal Society of Chemistry journal article supplement (doi:10.1039/c0cc04404k), 2011-01-01
Supplement: c0cc04404k.pdf [file c0cc04404k.pdf]

## Supporting Information

### All Chemically Deposited, Annealing and Mesoporous Metal Oxide Free CdSe Solar Cell

Cheng-Hsuan Lai, and Pi-Tai Chou\*

*Department of Chemistry and Instrumentation Center, National Taiwan University, Taipei 106, Taiwan. E-mail: chop@ntu.edu.tw.*

#### **Experimental section**

*Fabrication of FTO/TiO<sub>2</sub>/F/CdSe device:* As shown in Scheme 1 in the text (also shown below), the FTO substrates were cleaned by sonication sequentially in detergent water, ethanol and acetone. After treatment in a UV-O<sub>3</sub> system for 40 min, the FTO glass plate was immersed in 40 mM aqueous TiCl<sub>4</sub> solution for 0.5, 1, 1.5, 2 hrs at 60 °C and rinsed with water and ethanol. The substrates were then further immersed in NH<sub>4</sub>F aqueous solution for 2 min. For the CBD process, Na<sub>2</sub>SeSO<sub>3</sub> aqueous solution was synthesized according to previous report.<sup>1</sup> The pre-treated FTO substrates were then dipped into an ethanol solution containing Cd(NO<sub>3</sub>)<sub>2</sub> (0.5 M) for 30 min at 40 °C, rinsed with ethanol, and then dipped for another 7 hrs into the Na<sub>2</sub>SeSO<sub>3</sub> (0.5 M) solution at 40 °C and rinsed again with ethanol and water. These two-step dipping process is termed as one CBD cycle and the incorporated amount of CdSe can be increased by repeating the assembly cycles. The Pt counter electrode was prepared by spin-coating 50 mM H<sub>2</sub>PtCl<sub>6</sub> in isopropyl alcohol on FTO glass, followed by sintering at 385 °C for 15–30 min. The CdSe coated FTO electrode was then incorporated into a sandwich cell structure with a Pt-coated FTO as the counter electrode, and a film (Surlyn 1702, 25 μm) as a spacer between the electrodes. The polysulfide electrolyte solution (water : methanol = 1:1 by volume) was then injected

into the cell through a drilled hole in the back of the counter electrode. Lastly, the hole was sealed using a hot-melt ionomer film and a cover glass. Light-to-electricity conversion efficiency values were measured using a modified light source, 450 W Xe lamp (Oriel, 6266), an Oriel 81088 Air Mass 1.5 Global Filter and a digital source meter purchased from Keithley Instruments Inc. The incident light intensity was calibrated using a standard solar cell composed of a crystalline silicon solar cell and an IR cutoff filter (Schott, KG-5), giving the photoresponse range of amorphous silicon solar cell.

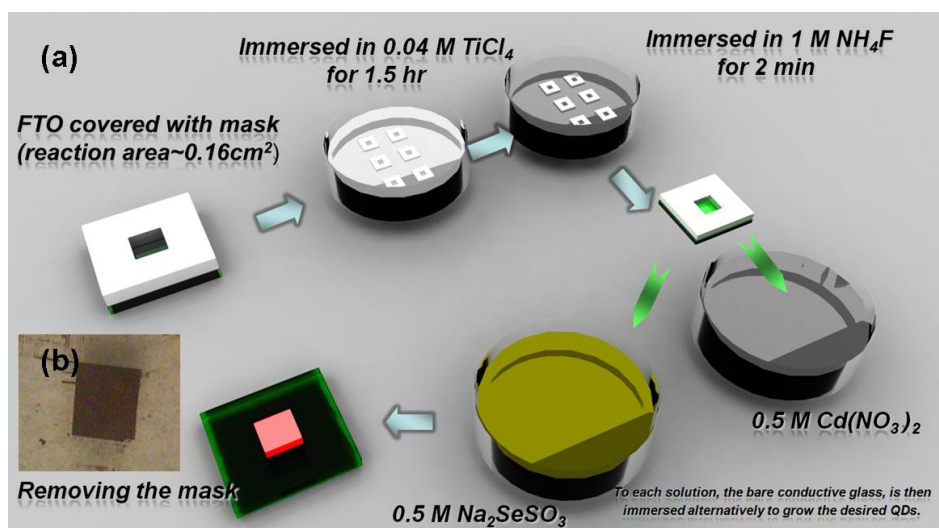

**Reference:**

1. Y. L. Lee and Y. S. Lo, *Adv. Funct. Mater.* 2009, **19**, 1

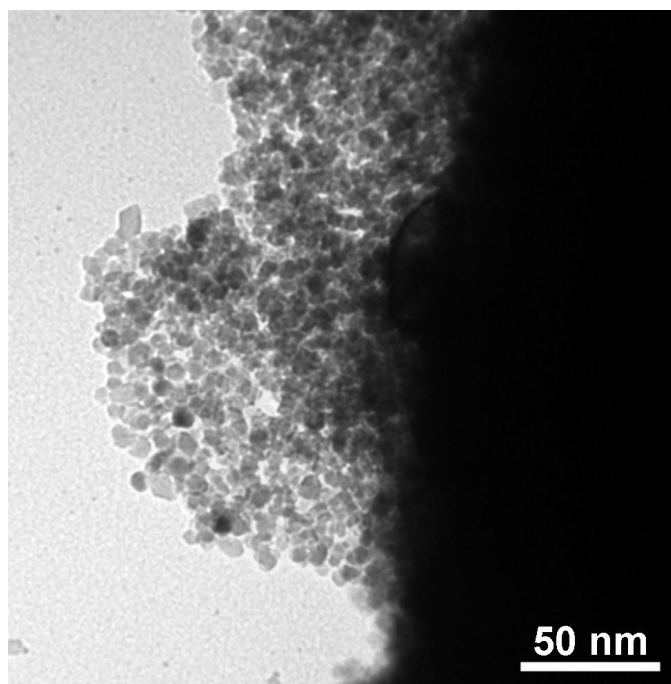

*Figure S1.* The TEM image of as-prepared CdSe film.

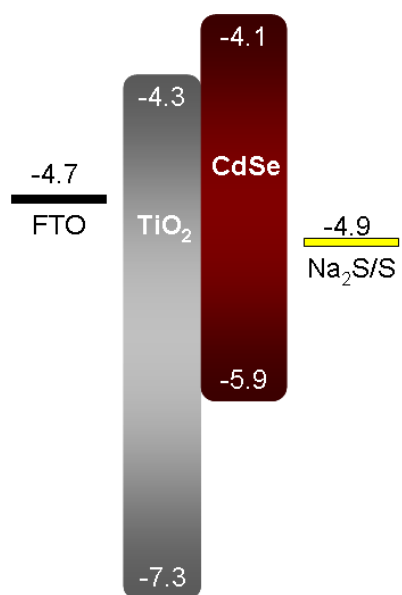

*Figure S2.* The corresponding energy diagram of device **FTO/TiO<sub>2</sub>/CdSe**.

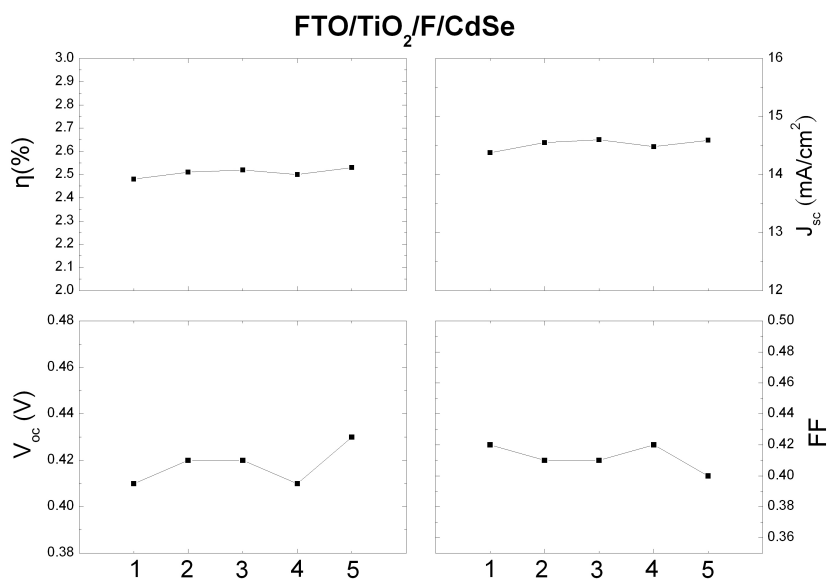

**Figure S3.** The cell performance parameters of five FTO/TiO<sub>2</sub>/F/CdSe devices under the same experimental conditions.

**Table S1.** The cell performance parameters of various types of CBD cells as a function of immersing time of NH<sub>4</sub>F

| Immersing time of NH <sub>4</sub> F(min) | J <sub>sc</sub> (mA/cm <sup>2</sup> ) | V <sub>oc</sub> (V) | FF   | η (%) |
|------------------------------------------|---------------------------------------|---------------------|------|-------|
| 0                                        | 13.67                                 | 0.42                | 0.35 | 2.01  |
| 1                                        | 13.77                                 | 0.41                | 0.39 | 2.20  |
| 2                                        | 14.55                                 | 0.42                | 0.41 | 2.51  |
| 5                                        | 14.44                                 | 0.43                | 0.4  | 2.48  |
| 30                                       | 14.28                                 | 0.42                | 0.41 | 2.46  |
